# Supplementary material for: The grazing gait, and implications of toppling table geometry for primate footfall sequences
Source: Biol Lett. 2018 May 16;14(5):20180137. doi: 10.1098/rsbl.2018.0137 (PMC6012707; doi:10.1098/rsbl.2018.0137)
Supplement: ExcelSurfaceCode.xlsx: An Excel workbook that calculates back height surfaces [file rsbl20180137supp13.xlsx]

## Sheet: 25% phase
The grazing gait, and implications of toppling table geometry for primate footfall sequences	Notes	Proportion of Left Hind stance	Proportion of stride	Supported Height profile	Supported Left Hind	Supported Left Fore	Supported Right Hind	Supported Right Fore	Derived Diagonal centrepoint	Unsupported Left Hind	Unsupported Left Fore	Unsupported Right Hind	Unsupported Right Fore	LH height	LF height	RH height	RF height		Choose integer % of stride cycle					LH height	LF height	RH height	RF height
Usherwood, J.R. and Smith, B.J.H.	This page, for a quadruped of DF=0.75, phase=25%:	0	0	0	0		0.844328	0.886204	0.443102		0.0418757			0	0.0418757	0.844328	0.886204		50					0.866025	0.866025	0	0
Biology Letters	1) calculates a down-up-down the down-up-down height profile of a hip or shoulder over a stance - E	0.0133333	0.01	0.0418757	0.0418757		0.821149	0.904827	0.473351		0.125553			0.0418757	0.125553	0.821149	0.904827
	2) calculates the height profiles for each hip or shoulder through stance - F to I	0.0266667	0.02	0.0836778	0.0836778		0.79653	0.921863	0.50277		0.209011			0.0836778	0.209011	0.79653	0.921863								Left	Right
	3) calculates the centrepoint of the back at all times (half way between the diagonal supports) - J	0.04	0.03	0.125333	0.125333		0.770513	0.937282	0.531308		0.292102			0.125333	0.292102	0.770513	0.937282							Fore	0.866025	0
	4) calculates the height of the remaining 'corner' hip or shoulder - K to N	0.0533333	0.04	0.166769	0.166769		0.743145	0.951057	0.558913		0.37468			0.166769	0.37468	0.743145	0.951057							Hind	0.866025	0
	5) calculates the height of hip or shoulder throughout the stride - O to R via AY to BB	0.0666667	0.05	0.207912	0.207912		0.714473	0.963163	0.585537		0.456602			0.207912	0.456602	0.714473	0.963163
	6) plots the height surface of the back for a chosen instant in the stride (cell S2)	0.08	0.06	0.24869	0.24869		0.684547	0.973579	0.611134		0.537722			0.24869	0.537722	0.684547	0.973579
	Note the discontinuity at the instant of FOREfoot placement (24-25% or 74-75%)	0.0933333	0.07	0.289032	0.289032		0.653421	0.982287	0.63566		0.617898			0.289032	0.617898	0.653421	0.982287
	Note the lack of discontinuity at the instant of HINDfoot placement (99-0% or 49-50%)	0.106667	0.08	0.328867	0.328867		0.621148	0.989272	0.659069		0.696991			0.328867	0.696991	0.621148	0.989272
		0.12	0.09	0.368125	0.368125		0.587785	0.994522	0.681323		0.774861			0.368125	0.774861	0.587785	0.994522
	Amplitude of height	0.133333	0.1	0.406737	0.406737		0.553392	0.998027	0.702382		0.851372			0.406737	0.851372	0.553392	0.998027
	1	0.146667	0.11	0.444635	0.444635		0.518027	0.999781	0.722208		0.926389			0.444635	0.926389	0.518027	0.999781
		0.16	0.12	0.481754	0.481754		0.481754	0.999781	0.740767		0.999781			0.481754	0.999781	0.481754	0.999781
		0.173333	0.13	0.518027	0.518027		0.444635	0.998027	0.758027		1.07142			0.518027	1.07142	0.444635	0.998027
		0.186667	0.14	0.553392	0.553392		0.406737	0.994522	0.773957		1.14118			0.553392	1.14118	0.406737	0.994522
		0.2	0.15	0.587785	0.587785		0.368125	0.989272	0.788529		1.20893			0.587785	1.20893	0.368125	0.989272
		0.213333	0.16	0.621148	0.621148		0.328867	0.982287	0.801718		1.27457			0.621148	1.27457	0.328867	0.982287
		0.226667	0.17	0.653421	0.653421		0.289032	0.973579	0.8135		1.33797			0.653421	1.33797	0.289032	0.973579
		0.24	0.18	0.684547	0.684547		0.24869	0.963163	0.823855		1.39902			0.684547	1.39902	0.24869	0.963163
		0.253333	0.19	0.714473	0.714473		0.207912	0.951057	0.832765		1.45762			0.714473	1.45762	0.207912	0.951057
		0.266667	0.2	0.743145	0.743145		0.166769	0.937282	0.840213		1.51366			0.743145	1.51366	0.166769	0.937282
		0.28	0.21	0.770513	0.770513		0.125333	0.921863	0.846188		1.56704			0.770513	1.56704	0.125333	0.921863
		0.293333	0.22	0.79653	0.79653		0.0836778	0.904827	0.850678		1.61768			0.79653	1.61768	0.0836778	0.904827
		0.306667	0.23	0.821149	0.821149		0.0418757	0.886204	0.853676		1.66548			0.821149	1.66548	0.0418757	0.886204
		0.32	0.24	0.844328	0.844328		1.22515e-16	0.866025	0.855177		1.71035			0.844328	1.71035	1.22515e-16	0.866025
		0.333333	0.25	0.866025	0.866025	0		0.844328	0.855177			1.71035		0.866025	0	1.71035	0.844328
		0.346667	0.26	0.886204	0.886204	0.0418757		0.821149	0.853676			1.66548		0.886204	0.0418757	1.66548	0.821149
		0.36	0.27	0.904827	0.904827	0.0836778		0.79653	0.850678			1.61768		0.904827	0.0836778	1.61768	0.79653
		0.373333	0.28	0.921863	0.921863	0.125333		0.770513	0.846188			1.56704		0.921863	0.125333	1.56704	0.770513
		0.386667	0.29	0.937282	0.937282	0.166769		0.743145	0.840213			1.51366		0.937282	0.166769	1.51366	0.743145
		0.4	0.3	0.951057	0.951057	0.207912		0.714473	0.832765			1.45762		0.951057	0.207912	1.45762	0.714473
		0.413333	0.31	0.963163	0.963163	0.24869		0.684547	0.823855			1.39902		0.963163	0.24869	1.39902	0.684547
		0.426667	0.32	0.973579	0.973579	0.289032		0.653421	0.8135			1.33797		0.973579	0.289032	1.33797	0.653421
		0.44	0.33	0.982287	0.982287	0.328867		0.621148	0.801718			1.27457		0.982287	0.328867	1.27457	0.621148
		0.453333	0.34	0.989272	0.989272	0.368125		0.587785	0.788529			1.20893		0.989272	0.368125	1.20893	0.587785
		0.466667	0.35	0.994522	0.994522	0.406737		0.553392	0.773957			1.14118		0.994522	0.406737	1.14118	0.553392
		0.48	0.36	0.998027	0.998027	0.444635		0.518027	0.758027			1.07142		0.998027	0.444635	1.07142	0.518027
		0.493333	0.37	0.999781	0.999781	0.481754		0.481754	0.740767			0.999781		0.999781	0.481754	0.999781	0.481754
		0.506667	0.38	0.999781	0.999781	0.518027		0.444635	0.722208			0.926389		0.999781	0.518027	0.926389	0.444635
		0.52	0.39	0.998027	0.998027	0.553392		0.406737	0.702382			0.851372		0.998027	0.553392	0.851372	0.406737
		0.533333	0.4	0.994522	0.994522	0.587785		0.368125	0.681323			0.774861		0.994522	0.587785	0.774861	0.368125
		0.546667	0.41	0.989272	0.989272	0.621148		0.328867	0.659069			0.696991		0.989272	0.621148	0.696991	0.328867
		0.56	0.42	0.982287	0.982287	0.653421		0.289032	0.63566			0.617898		0.982287	0.653421	0.617898	0.289032
		0.573333	0.43	0.973579	0.973579	0.684547		0.24869	0.611134			0.537722		0.973579	0.684547	0.537722	0.24869
		0.586667	0.44	0.963163	0.963163	0.714473		0.207912	0.585537			0.456602		0.963163	0.714473	0.456602	0.207912
		0.6	0.45	0.951057	0.951057	0.743145		0.166769	0.558913			0.37468		0.951057	0.743145	0.37468	0.166769
		0.613333	0.46	0.937282	0.937282	0.770513		0.125333	0.531308			0.292102		0.937282	0.770513	0.292102	0.125333
		0.626667	0.47	0.921863	0.921863	0.79653		0.0836778	0.50277			0.209011		0.921863	0.79653	0.209011	0.0836778
		0.64	0.48	0.904827	0.904827	0.821149		0.0418757	0.473351			0.125553		0.904827	0.821149	0.125553	0.0418757
		0.653333	0.49	0.886204	0.886204	0.844328		1.22515e-16	0.443102			0.0418757		0.886204	0.844328	0.0418757	1.22515e-16
		0.666667	0.5	0.866025	0.866025	0.866025	0		0.433013				0	0.866025	0.866025	0	0
		0.68	0.51	0.844328	0.844328	0.886204	0.0418757		0.46404				0.0837513	0.844328	0.886204	0.0418757	0.0837513
		0.693333	0.52	0.821149	0.821149	0.904827	0.0836778		0.494252				0.167356	0.821149	0.904827	0.0836778	0.167356
		0.706667	0.53	0.79653	0.79653	0.921863	0.125333		0.523598				0.250666	0.79653	0.921863	0.125333	0.250666
		0.72	0.54	0.770513	0.770513	0.937282	0.166769		0.552025				0.333537	0.770513	0.937282	0.166769	0.333537
		0.733333	0.55	0.743145	0.743145	0.951057	0.207912		0.579484				0.415823	0.743145	0.951057	0.207912	0.415823
		0.746667	0.56	0.714473	0.714473	0.963163	0.24869		0.605926				0.49738	0.714473	0.963163	0.24869	0.49738
		0.76	0.57	0.684547	0.684547	0.973579	0.289032		0.631305				0.578064	0.684547	0.973579	0.289032	0.578064
		0.773333	0.58	0.653421	0.653421	0.982287	0.328867		0.655577				0.657733	0.653421	0.982287	0.328867	0.657733
		0.786667	0.59	0.621148	0.621148	0.989272	0.368125		0.678698				0.736249	0.621148	0.989272	0.368125	0.736249
		0.8	0.6	0.587785	0.587785	0.994522	0.406737		0.700629				0.813473	0.587785	0.994522	0.406737	0.813473
		0.813333	0.61	0.553392	0.553392	0.998027	0.444635		0.721331				0.88927	0.553392	0.998027	0.444635	0.88927
		0.826667	0.62	0.518027	0.518027	0.999781	0.481754		0.740767				0.963507	0.518027	0.999781	0.481754	0.963507
		0.84	0.63	0.481754	0.481754	0.999781	0.518027		0.758904				1.03605	0.481754	0.999781	0.518027	1.03605
		0.853333	0.64	0.444635	0.444635	0.998027	0.553392		0.775709				1.10678	0.444635	0.998027	0.553392	1.10678
		0.866667	0.65	0.406737	0.406737	0.994522	0.587785		0.791154				1.17557	0.406737	0.994522	0.587785	1.17557
		0.88	0.66	0.368125	0.368125	0.989272	0.621148		0.80521				1.2423	0.368125	0.989272	0.621148	1.2423
		0.893333	0.67	0.328867	0.328867	0.982287	0.653421		0.817854				1.30684	0.328867	0.982287	0.653421	1.30684
		0.906667	0.68	0.289032	0.289032	0.973579	0.684547		0.829063				1.36909	0.289032	0.973579	0.684547	1.36909
		0.92	0.69	0.24869	0.24869	0.963163	0.714473		0.838818				1.42895	0.24869	0.963163	0.714473	1.42895
		0.933333	0.7	0.207912	0.207912	0.951057	0.743145		0.847101				1.48629	0.207912	0.951057	0.743145	1.48629
		0.946667	0.71	0.166769	0.166769	0.937282	0.770513		0.853898				1.54103	0.166769	0.937282	0.770513	1.54103
		0.96	0.72	0.125333	0.125333	0.921863	0.79653		0.859197				1.59306	0.125333	0.921863	0.79653	1.59306
		0.973333	0.73	0.0836778	0.0836778	0.904827	0.821149		0.862988				1.6423	0.0836778	0.904827	0.821149	1.6423
		0.986667	0.74	0.0418757	0.0418757	0.886204	0.844328		0.865266				1.68866	0.0418757	0.886204	0.844328	1.68866
		1	0.75	1.22515e-16	1.22515e-16	0.866025	0.866025	0	0.866025	1.73205				1.73205	0.866025	0.866025	0
			0.76			0.844328	0.886204	0.0418757	0.865266	1.68866				1.68866	0.844328	0.886204	0.0418757
			0.77			0.821149	0.904827	0.0836778	0.862988	1.6423				1.6423	0.821149	0.904827	0.0836778
			0.78			0.79653	0.921863	0.125333	0.859197	1.59306				1.59306	0.79653	0.921863	0.125333
			0.79			0.770513	0.937282	0.166769	0.853898	1.54103				1.54103	0.770513	0.937282	0.166769
			0.8			0.743145	0.951057	0.207912	0.847101	1.48629				1.48629	0.743145	0.951057	0.207912
			0.81			0.714473	0.963163	0.24869	0.838818	1.42895				1.42895	0.714473	0.963163	0.24869
			0.82			0.684547	0.973579	0.289032	0.829063	1.36909				1.36909	0.684547	0.973579	0.289032
			0.83			0.653421	0.982287	0.328867	0.817854	1.30684				1.30684	0.653421	0.982287	0.328867
			0.84			0.621148	0.989272	0.368125	0.80521	1.2423				1.2423	0.621148	0.989272	0.368125
			0.85			0.587785	0.994522	0.406737	0.791154	1.17557				1.17557	0.587785	0.994522	0.406737
			0.86			0.553392	0.998027	0.444635	0.775709	1.10678				1.10678	0.553392	0.998027	0.444635
			0.87			0.518027	0.999781	0.481754	0.758904	1.03605				1.03605	0.518027	0.999781	0.481754
			0.88			0.481754	0.999781	0.518027	0.740767	0.963507				0.963507	0.481754	0.999781	0.518027
			0.89			0.444635	0.998027	0.553392	0.721331	0.88927				0.88927	0.444635	0.998027	0.553392
			0.9			0.406737	0.994522	0.587785	0.700629	0.813473				0.813473	0.406737	0.994522	0.587785
			0.91			0.368125	0.989272	0.621148	0.678698	0.736249				0.736249	0.368125	0.989272	0.621148
			0.92			0.328867	0.982287	0.653421	0.655577	0.657733				0.657733	0.328867	0.982287	0.653421
			0.93			0.289032	0.973579	0.684547	0.631305	0.578064				0.578064	0.289032	0.973579	0.684547
			0.94			0.24869	0.963163	0.714473	0.605926	0.49738				0.49738	0.24869	0.963163	0.714473
			0.95			0.207912	0.951057	0.743145	0.579484	0.415823				0.415823	0.207912	0.951057	0.743145
			0.96			0.166769	0.937282	0.770513	0.552025	0.333537				0.333537	0.166769	0.937282	0.770513
			0.97			0.125333	0.921863	0.79653	0.523598	0.250666				0.250666	0.125333	0.921863	0.79653
			0.98			0.0836778	0.904827	0.821149	0.494252	0.167356				0.167356	0.0836778	0.904827	0.821149
			0.99			0.0418757	0.886204	0.844328	0.46404	0.0837513				0.0837513	0.0418757	0.886204	0.844328
			1			1.22515e-16	0.866025	0.866025	0.433013	0				0	1.22515e-16	0.866025	0.866025
[truncated: 4 more columns]

## Sheet: 75% phase
The grazing gait, and implications of toppling table geometry for primate footfall sequences	Notes	Proportion of Left Hind stance	Proportion of stride	Supported Height profile	Supported Left Hind	Supported Right Fore	Supported Right Hind	Supported Left Fore	Derived Diagonal centrepoint	Unsupported Left Hind	Unsupported Right Fore	Unsupported Right Hind	Unsupported Left Fore	LH height	RF height	RH height	LF height		Choose integer % of stride cycle					LH height	RF height	RH height	LF height
Usherwood, J.R. and Smith, B.J.H.	This page, for a quadruped of DF=0.75, phase=75% (primate-like):	0	0	0	0		0.844328	0.886204	0.865266		1.73053			0	1.73053	0.844328	0.886204		50					0.866025	0.866025	0	1.73205
Biology Letters	1) calculates a down-up-down the down-up-down height profile of a hip or shoulder over a stance - E	0.0133333	0.01	0.0418757	0.0418757		0.821149	0.904827	0.862988		1.6841			0.0418757	1.6841	0.821149	0.904827
	2) calculates the height profiles for each hip or shoulder through stance - F to I	0.0266667	0.02	0.0836778	0.0836778		0.79653	0.921863	0.859197		1.63472			0.0836778	1.63472	0.79653	0.921863								Left	Right
	3) calculates the centrepoint of the back at all times (half way between the diagonal supports) - J	0.04	0.03	0.125333	0.125333		0.770513	0.937282	0.853898		1.58246			0.125333	1.58246	0.770513	0.937282							Fore	1.73205	0.866025
	4) calculates the height of the remaining 'corner' hip or shoulder - K to N	0.0533333	0.04	0.166769	0.166769		0.743145	0.951057	0.847101		1.52743			0.166769	1.52743	0.743145	0.951057							Hind	0.866025	0
	5) calculates the height of hip or shoulder throughout the stride - O to R via AY to BB	0.0666667	0.05	0.207912	0.207912		0.714473	0.963163	0.838818		1.46972			0.207912	1.46972	0.714473	0.963163
	6) plots the height surface of the back for a chosen instant in the stride (cell S2)	0.08	0.06	0.24869	0.24869		0.684547	0.973579	0.829063		1.40944			0.24869	1.40944	0.684547	0.973579
	Note the discontinuity at the instant of HINDfoot placement (24-25% or 74-75%)	0.0933333	0.07	0.289032	0.289032		0.653421	0.982287	0.817854		1.34668			0.289032	1.34668	0.653421	0.982287
	Note the lack of discontinuity at the instant of FOREfoot placement (99-0% or 49-50%)	0.106667	0.08	0.328867	0.328867		0.621148	0.989272	0.80521		1.28155			0.328867	1.28155	0.621148	0.989272
		0.12	0.09	0.368125	0.368125		0.587785	0.994522	0.791154		1.21418			0.368125	1.21418	0.587785	0.994522
	Amplitude of height	0.133333	0.1	0.406737	0.406737		0.553392	0.998027	0.775709		1.14468			0.406737	1.14468	0.553392	0.998027
	1	0.146667	0.11	0.444635	0.444635		0.518027	0.999781	0.758904		1.07317			0.444635	1.07317	0.518027	0.999781
		0.16	0.12	0.481754	0.481754		0.481754	0.999781	0.740767		0.999781			0.481754	0.999781	0.481754	0.999781
		0.173333	0.13	0.518027	0.518027		0.444635	0.998027	0.721331		0.924635			0.518027	0.924635	0.444635	0.998027
		0.186667	0.14	0.553392	0.553392		0.406737	0.994522	0.700629		0.847867			0.553392	0.847867	0.406737	0.994522
		0.2	0.15	0.587785	0.587785		0.368125	0.989272	0.678698		0.769612			0.587785	0.769612	0.368125	0.989272
		0.213333	0.16	0.621148	0.621148		0.328867	0.982287	0.655577		0.690006			0.621148	0.690006	0.328867	0.982287
		0.226667	0.17	0.653421	0.653421		0.289032	0.973579	0.631305		0.60919			0.653421	0.60919	0.289032	0.973579
		0.24	0.18	0.684547	0.684547		0.24869	0.963163	0.605926		0.527305			0.684547	0.527305	0.24869	0.963163
		0.253333	0.19	0.714473	0.714473		0.207912	0.951057	0.579484		0.444496			0.714473	0.444496	0.207912	0.951057
		0.266667	0.2	0.743145	0.743145		0.166769	0.937282	0.552025		0.360906			0.743145	0.360906	0.166769	0.937282
		0.28	0.21	0.770513	0.770513		0.125333	0.921863	0.523598		0.276683			0.770513	0.276683	0.125333	0.921863
		0.293333	0.22	0.79653	0.79653		0.0836778	0.904827	0.494252		0.191975			0.79653	0.191975	0.0836778	0.904827
		0.306667	0.23	0.821149	0.821149		0.0418757	0.886204	0.46404		0.10693			0.821149	0.10693	0.0418757	0.886204
		0.32	0.24	0.844328	0.844328		1.22515e-16	0.866025	0.433013		0.0216975			0.844328	0.0216975	1.22515e-16	0.866025
		0.333333	0.25	0.866025	0.866025	0		0.844328	0.433013			0.10693		0.866025	0	0.10693	0.844328
		0.346667	0.26	0.886204	0.886204	0.0418757		0.821149	0.46404			0.191975		0.886204	0.0418757	0.191975	0.821149
		0.36	0.27	0.904827	0.904827	0.0836778		0.79653	0.494252			0.276683		0.904827	0.0836778	0.276683	0.79653
		0.373333	0.28	0.921863	0.921863	0.125333		0.770513	0.523598			0.360906		0.921863	0.125333	0.360906	0.770513
		0.386667	0.29	0.937282	0.937282	0.166769		0.743145	0.552025			0.444496		0.937282	0.166769	0.444496	0.743145
		0.4	0.3	0.951057	0.951057	0.207912		0.714473	0.579484			0.527305		0.951057	0.207912	0.527305	0.714473
		0.413333	0.31	0.963163	0.963163	0.24869		0.684547	0.605926			0.60919		0.963163	0.24869	0.60919	0.684547
		0.426667	0.32	0.973579	0.973579	0.289032		0.653421	0.631305			0.690006		0.973579	0.289032	0.690006	0.653421
		0.44	0.33	0.982287	0.982287	0.328867		0.621148	0.655577			0.769612		0.982287	0.328867	0.769612	0.621148
		0.453333	0.34	0.989272	0.989272	0.368125		0.587785	0.678698			0.847867		0.989272	0.368125	0.847867	0.587785
		0.466667	0.35	0.994522	0.994522	0.406737		0.553392	0.700629			0.924635		0.994522	0.406737	0.924635	0.553392
		0.48	0.36	0.998027	0.998027	0.444635		0.518027	0.721331			0.999781		0.998027	0.444635	0.999781	0.518027
		0.493333	0.37	0.999781	0.999781	0.481754		0.481754	0.740767			1.07317		0.999781	0.481754	1.07317	0.481754
		0.506667	0.38	0.999781	0.999781	0.518027		0.444635	0.758904			1.14468		0.999781	0.518027	1.14468	0.444635
		0.52	0.39	0.998027	0.998027	0.553392		0.406737	0.775709			1.21418		0.998027	0.553392	1.21418	0.406737
		0.533333	0.4	0.994522	0.994522	0.587785		0.368125	0.791154			1.28155		0.994522	0.587785	1.28155	0.368125
		0.546667	0.41	0.989272	0.989272	0.621148		0.328867	0.80521			1.34668		0.989272	0.621148	1.34668	0.328867
		0.56	0.42	0.982287	0.982287	0.653421		0.289032	0.817854			1.40944		0.982287	0.653421	1.40944	0.289032
		0.573333	0.43	0.973579	0.973579	0.684547		0.24869	0.829063			1.46972		0.973579	0.684547	1.46972	0.24869
		0.586667	0.44	0.963163	0.963163	0.714473		0.207912	0.838818			1.52743		0.963163	0.714473	1.52743	0.207912
		0.6	0.45	0.951057	0.951057	0.743145		0.166769	0.847101			1.58246		0.951057	0.743145	1.58246	0.166769
		0.613333	0.46	0.937282	0.937282	0.770513		0.125333	0.853898			1.63472		0.937282	0.770513	1.63472	0.125333
		0.626667	0.47	0.921863	0.921863	0.79653		0.0836778	0.859197			1.6841		0.921863	0.79653	1.6841	0.0836778
		0.64	0.48	0.904827	0.904827	0.821149		0.0418757	0.862988			1.73053		0.904827	0.821149	1.73053	0.0418757
		0.653333	0.49	0.886204	0.886204	0.844328		1.22515e-16	0.865266			1.73205		0.886204	0.844328	1.73205	1.22515e-16
		0.666667	0.5	0.866025	0.866025	0.866025	0		0.866025				1.73205	0.866025	0.866025	0	1.73205
		0.68	0.51	0.844328	0.844328	0.886204	0.0418757		0.865266				1.68866	0.844328	0.886204	0.0418757	1.68866
		0.693333	0.52	0.821149	0.821149	0.904827	0.0836778		0.862988				1.6423	0.821149	0.904827	0.0836778	1.6423
		0.706667	0.53	0.79653	0.79653	0.921863	0.125333		0.859197				1.59306	0.79653	0.921863	0.125333	1.59306
		0.72	0.54	0.770513	0.770513	0.937282	0.166769		0.853898				1.54103	0.770513	0.937282	0.166769	1.54103
		0.733333	0.55	0.743145	0.743145	0.951057	0.207912		0.847101				1.48629	0.743145	0.951057	0.207912	1.48629
		0.746667	0.56	0.714473	0.714473	0.963163	0.24869		0.838818				1.42895	0.714473	0.963163	0.24869	1.42895
		0.76	0.57	0.684547	0.684547	0.973579	0.289032		0.829063				1.36909	0.684547	0.973579	0.289032	1.36909
		0.773333	0.58	0.653421	0.653421	0.982287	0.328867		0.817854				1.30684	0.653421	0.982287	0.328867	1.30684
		0.786667	0.59	0.621148	0.621148	0.989272	0.368125		0.80521				1.2423	0.621148	0.989272	0.368125	1.2423
		0.8	0.6	0.587785	0.587785	0.994522	0.406737		0.791154				1.17557	0.587785	0.994522	0.406737	1.17557
		0.813333	0.61	0.553392	0.553392	0.998027	0.444635		0.775709				1.10678	0.553392	0.998027	0.444635	1.10678
		0.826667	0.62	0.518027	0.518027	0.999781	0.481754		0.758904				1.03605	0.518027	0.999781	0.481754	1.03605
		0.84	0.63	0.481754	0.481754	0.999781	0.518027		0.740767				0.963507	0.481754	0.999781	0.518027	0.963507
		0.853333	0.64	0.444635	0.444635	0.998027	0.553392		0.721331				0.88927	0.444635	0.998027	0.553392	0.88927
		0.866667	0.65	0.406737	0.406737	0.994522	0.587785		0.700629				0.813473	0.406737	0.994522	0.587785	0.813473
		0.88	0.66	0.368125	0.368125	0.989272	0.621148		0.678698				0.736249	0.368125	0.989272	0.621148	0.736249
		0.893333	0.67	0.328867	0.328867	0.982287	0.653421		0.655577				0.657733	0.328867	0.982287	0.653421	0.657733
		0.906667	0.68	0.289032	0.289032	0.973579	0.684547		0.631305				0.578064	0.289032	0.973579	0.684547	0.578064
		0.92	0.69	0.24869	0.24869	0.963163	0.714473		0.605926				0.49738	0.24869	0.963163	0.714473	0.49738
		0.933333	0.7	0.207912	0.207912	0.951057	0.743145		0.579484				0.415823	0.207912	0.951057	0.743145	0.415823
		0.946667	0.71	0.166769	0.166769	0.937282	0.770513		0.552025				0.333537	0.166769	0.937282	0.770513	0.333537
		0.96	0.72	0.125333	0.125333	0.921863	0.79653		0.523598				0.250666	0.125333	0.921863	0.79653	0.250666
		0.973333	0.73	0.0836778	0.0836778	0.904827	0.821149		0.494252				0.167356	0.0836778	0.904827	0.821149	0.167356
		0.986667	0.74	0.0418757	0.0418757	0.886204	0.844328		0.46404				0.0837513	0.0418757	0.886204	0.844328	0.0837513
		1	0.75	1.22515e-16	1.22515e-16	0.866025	0.866025	0	0.433013	0				1.22515e-16	0.866025	0.866025	0
			0.76			0.844328	0.886204	0.0418757	0.46404	0.0837513				0.0837513	0.844328	0.886204	0.0418757
			0.77			0.821149	0.904827	0.0836778	0.494252	0.167356				0.167356	0.821149	0.904827	0.0836778
			0.78			0.79653	0.921863	0.125333	0.523598	0.250666				0.250666	0.79653	0.921863	0.125333
			0.79			0.770513	0.937282	0.166769	0.552025	0.333537				0.333537	0.770513	0.937282	0.166769
			0.8			0.743145	0.951057	0.207912	0.579484	0.415823				0.415823	0.743145	0.951057	0.207912
			0.81			0.714473	0.963163	0.24869	0.605926	0.49738				0.49738	0.714473	0.963163	0.24869
			0.82			0.684547	0.973579	0.289032	0.631305	0.578064				0.578064	0.684547	0.973579	0.289032
			0.83			0.653421	0.982287	0.328867	0.655577	0.657733				0.657733	0.653421	0.982287	0.328867
			0.84			0.621148	0.989272	0.368125	0.678698	0.736249				0.736249	0.621148	0.989272	0.368125
			0.85			0.587785	0.994522	0.406737	0.700629	0.813473				0.813473	0.587785	0.994522	0.406737
			0.86			0.553392	0.998027	0.444635	0.721331	0.88927				0.88927	0.553392	0.998027	0.444635
			0.87			0.518027	0.999781	0.481754	0.740767	0.963507				0.963507	0.518027	0.999781	0.481754
			0.88			0.481754	0.999781	0.518027	0.758904	1.03605				1.03605	0.481754	0.999781	0.518027
			0.89			0.444635	0.998027	0.553392	0.775709	1.10678				1.10678	0.444635	0.998027	0.553392
			0.9			0.406737	0.994522	0.587785	0.791154	1.17557				1.17557	0.406737	0.994522	0.587785
			0.91			0.368125	0.989272	0.621148	0.80521	1.2423				1.2423	0.368125	0.989272	0.621148
			0.92			0.328867	0.982287	0.653421	0.817854	1.30684				1.30684	0.328867	0.982287	0.653421
			0.93			0.289032	0.973579	0.684547	0.829063	1.36909				1.36909	0.289032	0.973579	0.684547
			0.94			0.24869	0.963163	0.714473	0.838818	1.42895				1.42895	0.24869	0.963163	0.714473
			0.95			0.207912	0.951057	0.743145	0.847101	1.48629				1.48629	0.207912	0.951057	0.743145
			0.96			0.166769	0.937282	0.770513	0.853898	1.54103				1.54103	0.166769	0.937282	0.770513
			0.97			0.125333	0.921863	0.79653	0.859197	1.59306				1.59306	0.125333	0.921863	0.79653
			0.98			0.0836778	0.904827	0.821149	0.862988	1.6423				1.6423	0.0836778	0.904827	0.821149
			0.99			0.0418757	0.886204	0.844328	0.865266	1.68866				1.68866	0.0418757	0.886204	0.844328
			1			1.22515e-16	0.866025	0.866025	0.866025	1.73205				1.73205	1.22515e-16	0.866025	0.866025
[truncated: 4 more columns]
